# Supplementary material
Source: PubMed Central journal article supplement (PMC7336392)
Supplement: NIHMS1602522-supplement-Sup_Figs.pdf [file NIHMS1602522-supplement-Sup_Figs.pdf]

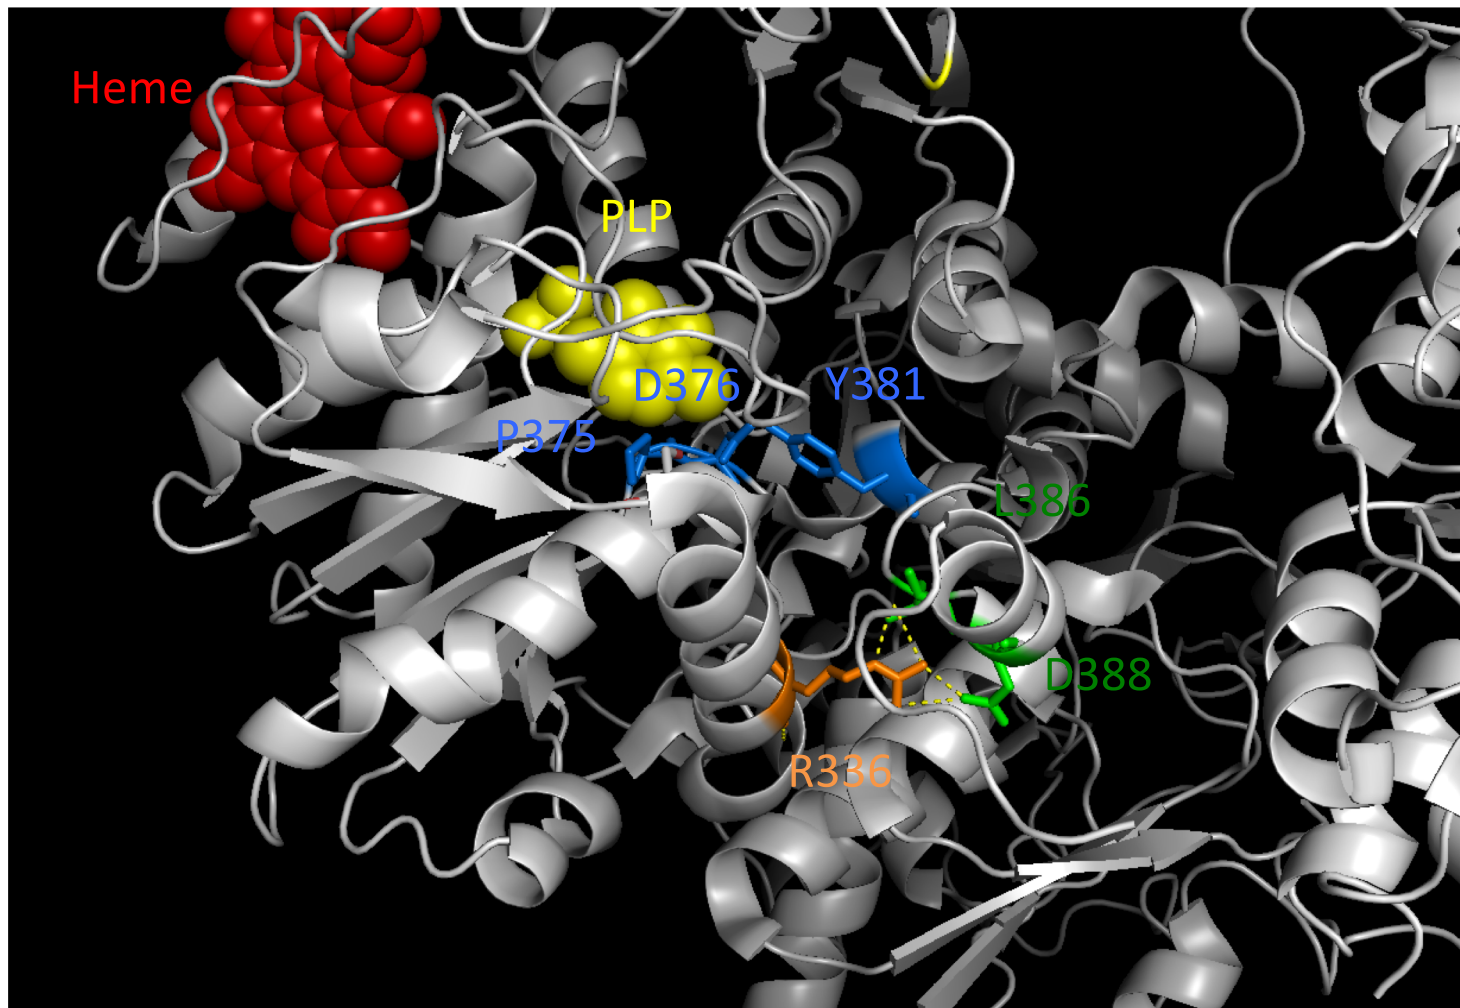

Supplemental Figure 1

A.

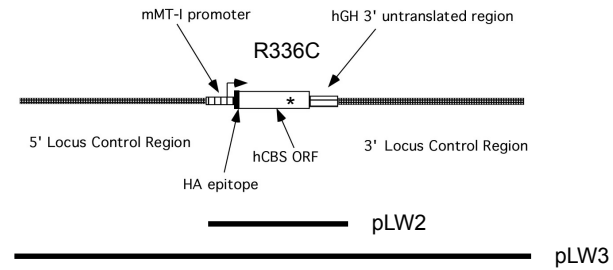

B.

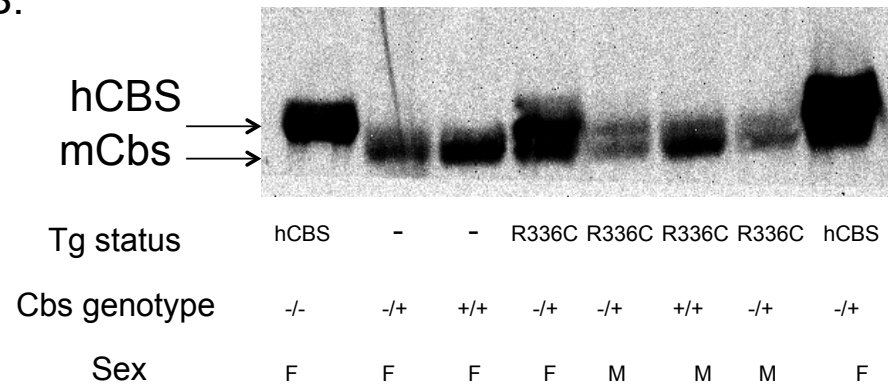

Figure 1. A. Schematic of Tg-R336C construct. B. Western blot showing expression of transgene and endogenous mouse CBS in liver. All mice were on zinc water to induce expression.

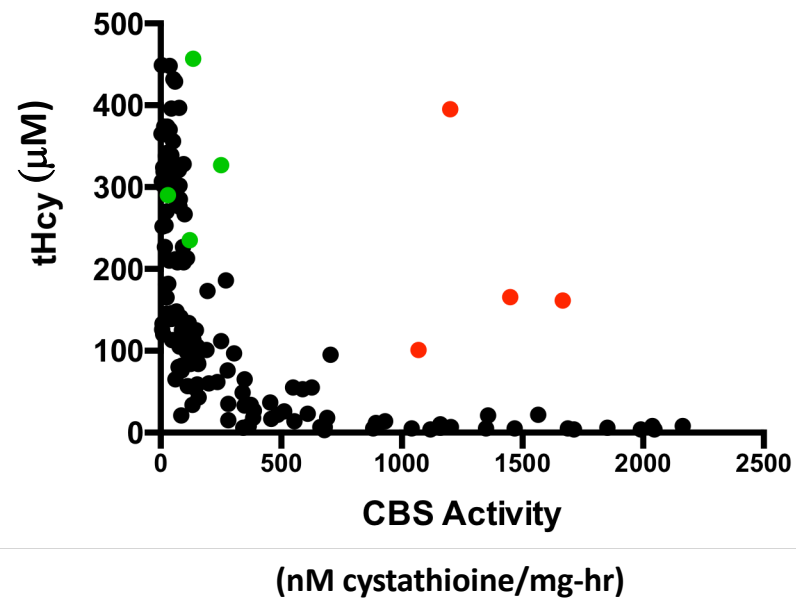

Supplemental Figure 3.

# L-Serine

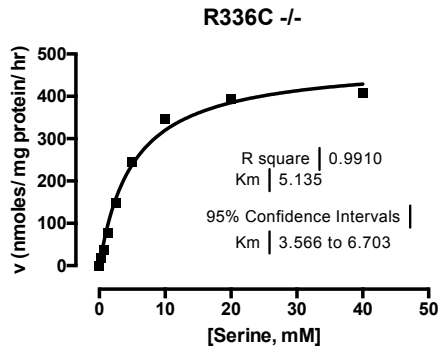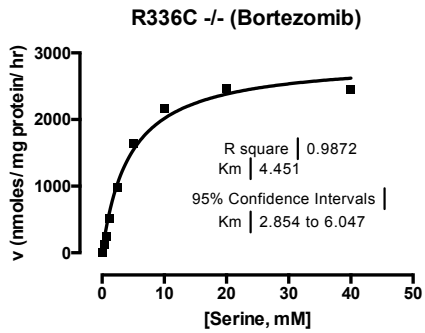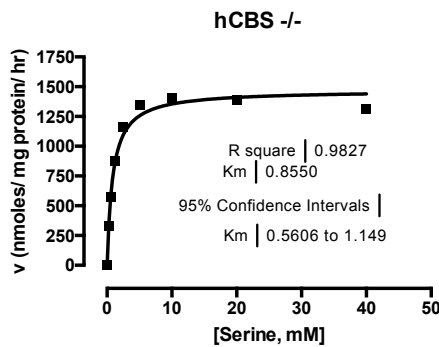

# Homocysteine

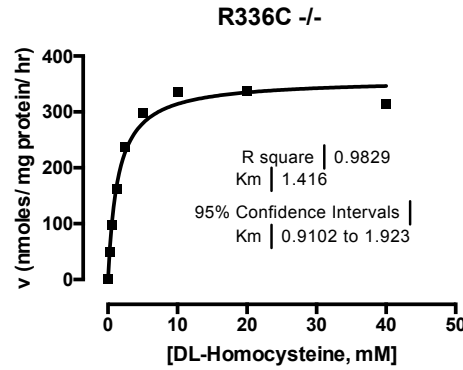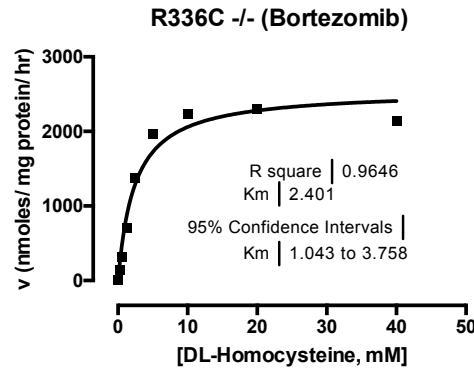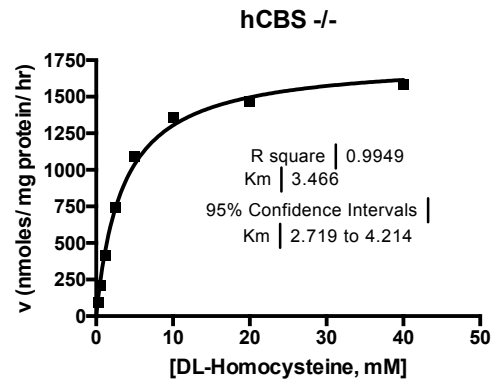

# S-Adenosyl-L-methionine

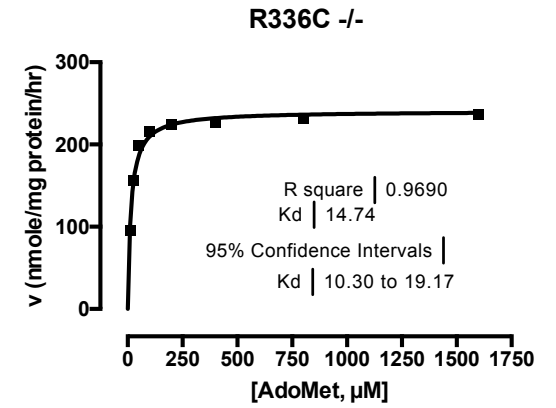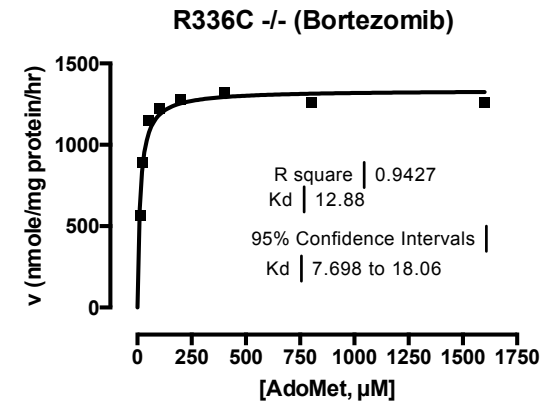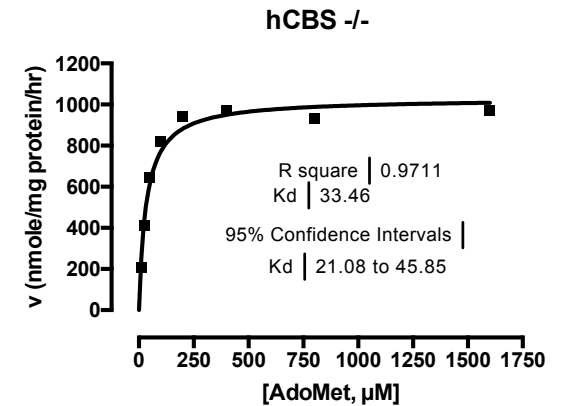

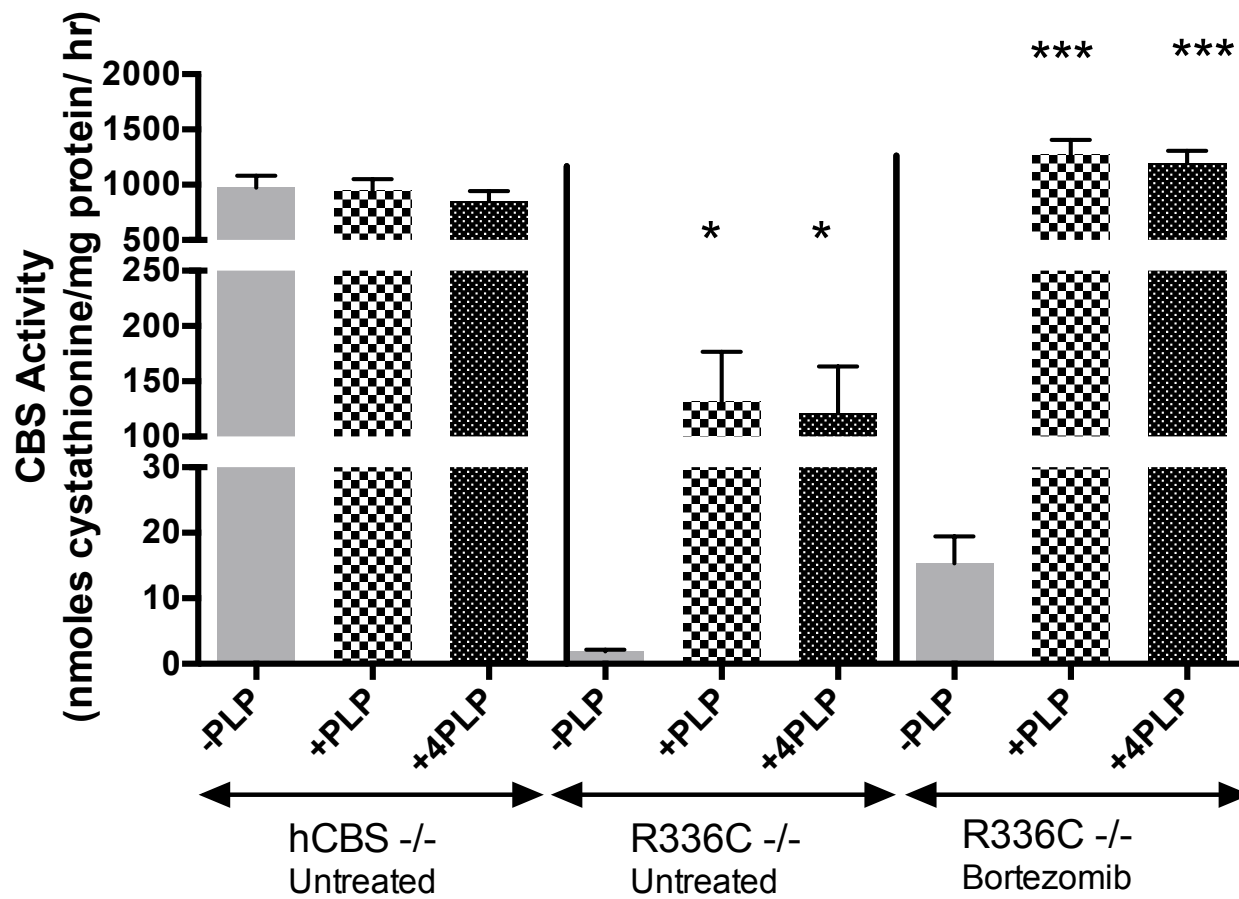

Supplemental Figure 5

**A.**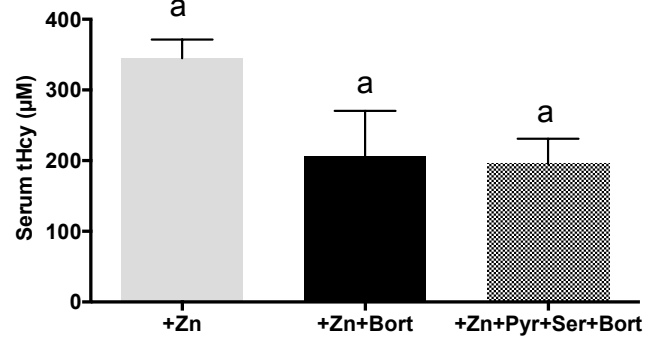**B.**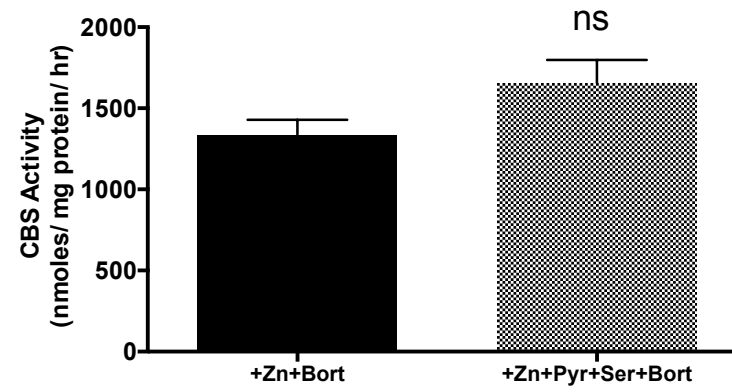**C.**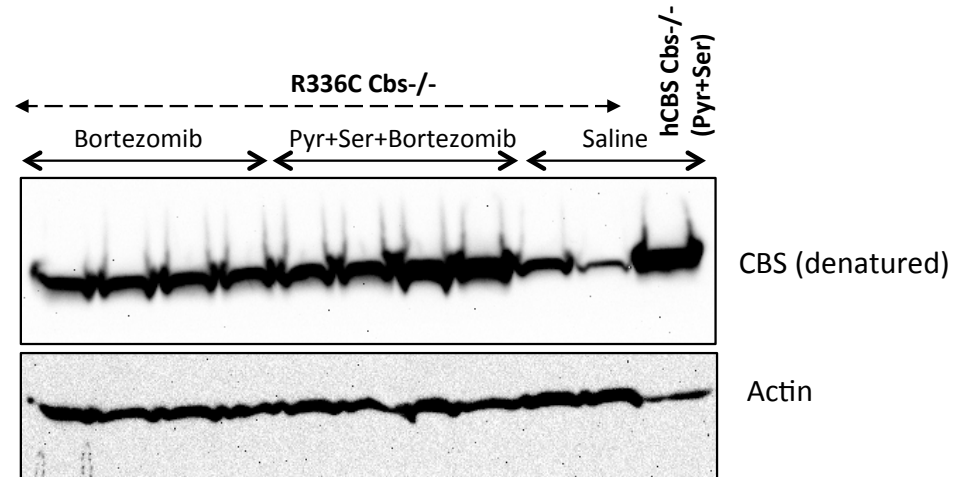

Supplemental Figure 6
